**Abstract #: 1447****Gastric histopathology by *Helicobacter pylori* *cagA* status in Arctic Canada**

Taylor Cromarty<sup>1</sup>, Douglas Quilty<sup>2</sup>, Ali Assi<sup>1</sup>, Safwat Girgis<sup>1</sup>, Sander Veldhuyzen van Zanten<sup>1</sup>, Karen Goodman<sup>1</sup>, CANHelp Working Group<sup>1</sup>

<sup>1</sup>University Of Alberta, Edmonton, Canada, <sup>2</sup>Queen's University, Kingston, Canada

**Background:** Our community-driven projects address concerns of Canadian Arctic Indigenous communities about *Helicobacter pylori* (*Hp*) infection, responsible for elevated gastric cancer mortality in the region. Community research partners wished to learn whether bacterial characteristics determine severity of *Hp*-related disease in their communities. We aimed to describe gastric histopathology by *cagA* genotype of *Hp* isolated from residents of 7 Indigenous communities in the Northwest Territories and Yukon.

**Methods:** Participants underwent gastroscopy with 5-6 biopsies taken for histopathological assessment and 2 biopsies taken for tissue culture during 2008-2017. We used multiple PCR reactions and DNA sequence analysis to classify *Hp* genotypes as *cagA*+ or *cagA*-. A single pathologist used the updated Sydney classification system to grade severity of 5 gastric pathology outcomes: *Hp* density; chronic gastritis; active gastritis; atrophy; and intestinal metaplasia. We estimated prevalence of each outcome with 95% confidence intervals (CI) by gastric subsite and *cagA* status.

**Results:** Of 262 *Hp* isolates assessed, 142 (54%) were *cagA*+. Prevalence of moderate-high *Hp* density, severe chronic gastritis, moderate-severe active gastritis, atrophy, and metaplasia were (%[CI]): respectively, 78[70-85], 44[36-53], 65[56-72], 55[46-63], 25[18-33] in *cagA*+ participants and 61[52-70], 35[27-44], 31[23-40], 32[23-41], 8[4-15] in *cagA*- participants. *cagA*+ participants had higher prevalence of all outcomes in antrum and corpus.

**Conclusion:** *Hp*-infected Indigenous residents of Arctic Canada who harbored *cagA*-positive strains had higher prevalence of more severe gastric pathology than those with *cagA*-negative strains.

**Key messages:** Community-driven research answers questions posed by those who bear the disease burden.
